# Supplementary material
Source: PubMed Central journal article supplement (PMC6377828)

Supplemental Fig S1: Representative time-activity curves of [<sup>18</sup>F]α<sub>v</sub>β<sub>6</sub>-BP for whole blood and plasma.

Data are expressed as decay-corrected percent of injected dose per gram of sample [dc %ID/g].

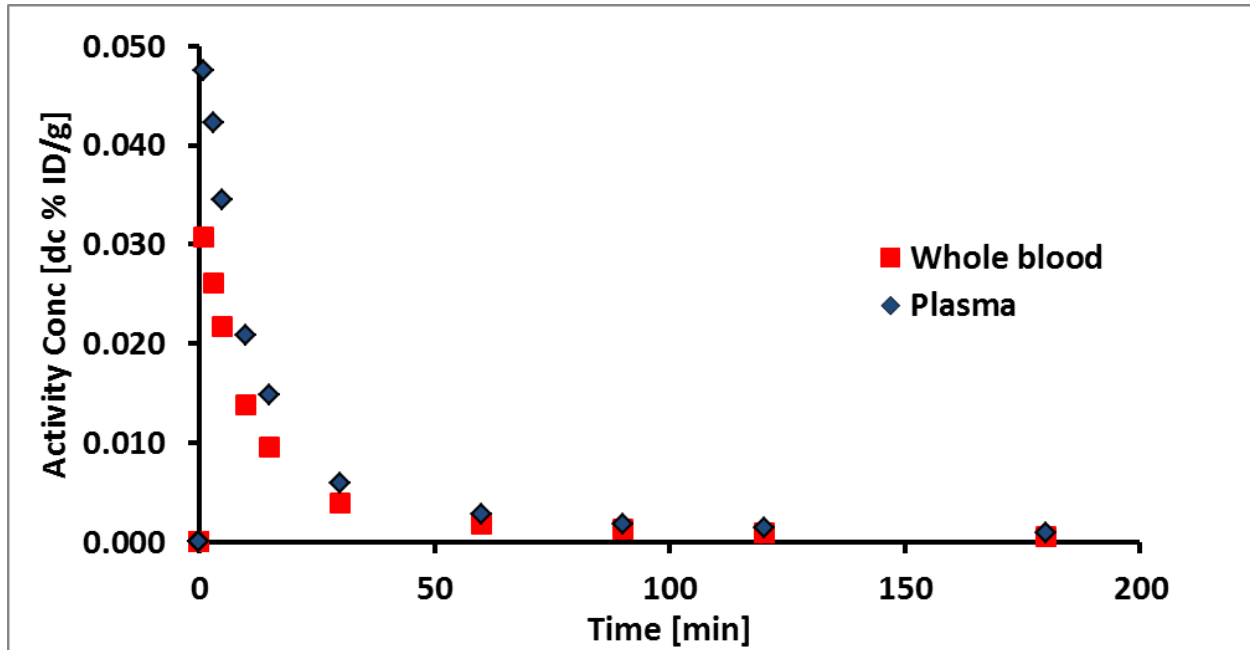

Supplement: NIHMS1512001-supplement-2.pdf [file NIHMS1512001-supplement-2.pdf]
