# Supplementary material
Source: PubMed Central journal article supplement (PMC6377828)

**Supplemental Fig S2: *In vivo* stability of [<sup>18</sup>F]α<sub>v</sub>β<sub>6</sub>-BP in human blood.** Representative radio-HPLC of blood sample taken 30 min post injection. Top: Sample only; bottom: sample spiked with [<sup>18</sup>F]α<sub>v</sub>β<sub>6</sub>-BP. X-axis: retention time [min]; Y-axis: detector response [volts].

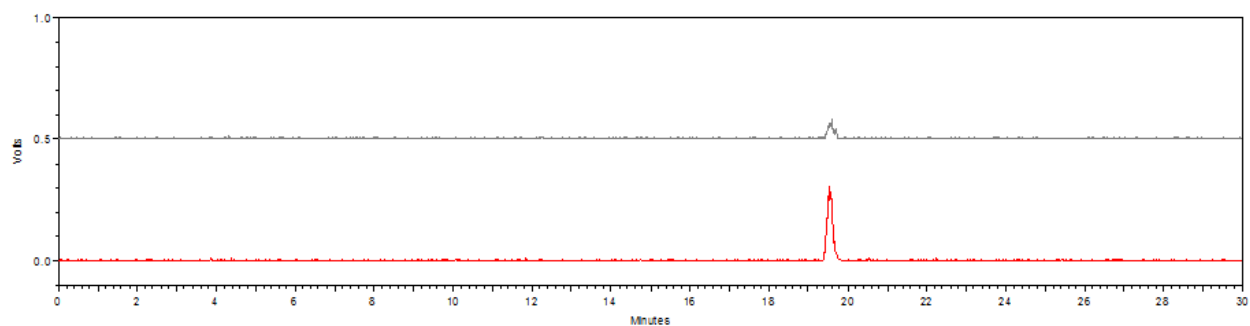

Supplement: NIHMS1512001-supplement-3.pdf [file NIHMS1512001-supplement-3.pdf]
