# Supplementary material
Source: PubMed Central journal article supplement (PMC6377828)
Supplement: NIHMS1512001-supplement-4.pdf [file NIHMS1512001-supplement-4.pdf]

**Supplemental Table S1:** Quality assurance release criteria for [<sup>18</sup>F]α<sub>v</sub>β<sub>6</sub>-BP

| <b>Pre-Release tests</b>      | <b>Specification</b>                                                                                                                |
|-------------------------------|-------------------------------------------------------------------------------------------------------------------------------------|
| Appearance                    | colorless, and particle free                                                                                                        |
| pH                            | 4.5-8.0                                                                                                                             |
| Radiochemical purity (HPLC)   | >90%                                                                                                                                |
| Radiochemical identity (HPLC) | Sample retention time conforms to the reference standard retention time                                                             |
| Radionuclidic identity        | Measured half-life 105-115 minutes                                                                                                  |
| Residual solvent levels       | Ethanol <10%<br>Acetone <5000 ppm<br>Acetonitrile <410 ppm<br>DIPEA <25 ppm<br>Acetic acid <5000 ppm<br>Dimethylsulfoxide <5000 ppm |
| Kryptofix levels              | <50 µg/mL                                                                                                                           |
| Bacterial Endotoxin levels    | <5 EU/mL                                                                                                                            |
| Filter integrity test         | Meet pressure specified by manufacturer (≥50 psi)                                                                                   |
| Mass dose                     | ≤50 µg                                                                                                                              |
| Molar activity                | ≥37 GBq/µmol                                                                                                                        |
| <b>Post-Release Test</b>      | <b>Specification</b>                                                                                                                |
| Sterility                     | No growth observed in 14 days                                                                                                       |
