# Supplementary material
Source: PubMed Central journal article supplement (PMC6377828)
Supplement: NIHMS1512001-supplement-5.pdf [file NIHMS1512001-supplement-5.pdf]

**Supplemental Table S2:** Biodistribution data for [<sup>18</sup>F]α<sub>v</sub>β<sub>6</sub>-BP in mice bearing paired α<sub>v</sub>β<sub>6</sub>-expressing DX3puroβ<sub>6</sub> and non-α<sub>v</sub>β<sub>6</sub>-expressing DX3puro xenograft tumors at 1, 2 and 4 h p.i. and at 1 h p.i. after pre-administration of blocking peptide. Tissue uptake is expressed as decay-corrected percent injected dose per gram of tissue (dc % ID/g)

| Time point                                 | 1 h         |           | 1 h - blocked |           | 2 h         |           | 4 h         |           |
|--------------------------------------------|-------------|-----------|---------------|-----------|-------------|-----------|-------------|-----------|
|                                            | Mean        | SD        | Mean          | SD        | Mean        | SD        | Mean        | SD        |
| <b>DX3puroβ<sub>6</sub></b>                | 2.51        | 0.48      | 0.28          | 0.07      | 1.76        | 0.36      | 2.64        | 1.23      |
| <b>DX3puro</b>                             | 0.35        | 0.14      | 0.26          | 0.03      | 0.18        | 0.08      | 0.21        | 0.15      |
| <b>Blood</b>                               | 0.34        | 0.24      | 0.29          | 0.04      | 0.10        | 0.02      | 0.07        | 0.07      |
| <b>Pancreas</b>                            | 0.09        | 0.13      | 0.13          | 0.05      | 0.13        | 0.05      | 0.21        | 0.09      |
| <b>Liver</b>                               | 0.28        | 0.08      | 0.23          | 0.03      | 0.09        | 0.02      | 0.08        | 0.02      |
| <b>Muscle</b>                              | 0.69        | 0.05      | 0.12          | 0.01      | 0.53        | 0.09      | 0.65        | 0.22      |
| <b>Kidneys</b>                             | 22.88       | 8.94      | 9.56          | 0.22      | 12.40       | 2.94      | 7.87        | 2.11      |
| <b>Bladder</b>                             | 1.79        | 0.67      | 0.91          | 0.89      | 1.39        | 0.43      | 1.80        | 1.83      |
| <b>Gallbladder</b>                         | 4.88        | 3.99      | 13.54         | 6.92      | 11.48       | 7.20      | 4.47        | 2.95      |
| <b>Heart</b>                               | 0.74        | 0.16      | 0.11          | 0.03      | 0.50        | 0.17      | 0.54        | 0.34      |
| <b>Lung</b>                                | 2.30        | 0.77      | 0.28          | 0.07      | 1.83        | 0.24      | 2.29        | 0.16      |
| <b>Spleen</b>                              | 0.08        | 0.09      | 0.12          | 0.05      | 0.05        | 0.02      | 0.06        | 0.02      |
| <b>Stomach</b>                             | 7.41        | 1.76      | 0.11          | 0.04      | 4.58        | 0.44      | 5.63        | 1.63      |
| <b>Small intestine</b>                     | 4.52        | 1.29      | 0.19          | 0.01      | 1.23        | 0.18      | 0.75        | 0.31      |
| <b>Skin</b>                                | 1.59        | 0.79      | 0.24          | 0.05      | 0.83        | 0.17      | 0.65        | 0.14      |
| <b>Bone</b>                                | 0.80        | 0.09      | 0.78          | 0.21      | 0.59        | 0.08      | 0.69        | 0.12      |
| <b>Brain</b>                               | 0.06        | 0.02      | 0.08          | 0.02      | 0.02        | 0.00      | 0.02        | 0.01      |
|                                            |             |           |               |           |             |           |             |           |
| <b>Ratio (DX3puroβ<sub>6</sub>/Tissue)</b> | <b>Mean</b> | <b>SD</b> | <b>Mean</b>   | <b>SD</b> | <b>Mean</b> | <b>SD</b> | <b>Mean</b> | <b>SD</b> |
| <b>DX3puroβ<sub>6</sub>/DX3puro</b>        | 8.33        | 4.20      | 1.07          | 0.15      | 11.03       | 3.26      | 18.31       | 11.67     |
| <b>DX3puroβ<sub>6</sub>/Blood</b>          | 9.41        | 4.14      | 0.96          | 0.11      | 17.22       | 4.27      | 21.38       | 7.37      |
| <b>DX3puroβ<sub>6</sub>/Liver</b>          | 9.37        | 2.56      | 1.22          | 0.26      | 19.02       | 4.04      | 37.75       | 22.47     |
| <b>DX3puroβ<sub>6</sub>/Kidneys</b>        | 0.12        | 0.02      | 0.03          | 0.01      | 0.14        | 0.02      | 0.33        | 0.08      |
| <b>DX3puroβ<sub>6</sub>/Muscle</b>         | 3.63        | 0.36      | 2.38          | 0.44      | 3.35        | 0.49      | 4.62        | 2.64      |
