# Supplementary material
Source: PubMed Central journal article supplement (PMC6377828)
Supplement: NIHMS1512001-supplement-6.pdf [file NIHMS1512001-supplement-6.pdf]

**Supplemental Table S3:** Maximum standard uptake values ( $SUV_{max}$ ) at the 1 and 3 hour time points for the five subjects, decay corrected to the time of injection.

| Organ              | Subject 1<br>1 h & 3 h |      | Subject 2<br>1 h & 3 h |       | Subject 3<br>1 h & 3 h |      | Subject 4<br>1 h & 3 h |      | Subject 5<br>1 h & 3 h |      |
|--------------------|------------------------|------|------------------------|-------|------------------------|------|------------------------|------|------------------------|------|
| Brain              | 0.2                    | 0.1  | 0.1                    | 0.1   | 0.1                    | 0.1  | 0.1                    | 0.2  | 1.1                    | 0.4  |
| Pituitary          | 10.3                   | 6.8  | 15                     | 10.2  | 7.2                    | 6.8  | 7.9                    | 7.8  | 11.8                   | 8.7  |
| L. Lacrimal        | 3.8                    | 2.9  | 5.5                    | 3.5   | 4.1                    | 3.3  | 5.3                    | 4.2  | 3.4                    | 2.1  |
| L. Parotid         | 4.1                    | 2.9  | 3.9                    | 2.8   | 6.5                    | 5.2  | 5.5                    | 3.8  | 5.8                    | 4.3  |
| L. Submandibular   | 6.6                    | 5    | 6.5                    | 4.9   | 8.7                    | 7.5  | 8.5                    | 6.6  | 4                      | 6.3  |
| Thyroid            | 6.9                    | 7.8  | 19.7                   | 20.9  | 11.7                   | 11.7 | 4.4                    | 4.5  | 13.7                   | 14.6 |
| Proximal Esophagus | 1.5                    | 1.8  | 1.8                    | 1.8   | 2.3                    | 3.6  | 1.4                    | 1.3  | 1.3                    | 3.2  |
| Mid Esophagus      | 1.9                    | 1.4  | 2.2                    | 1.7   | 3.1                    | 2.4  | 1.2                    | 1.2  | 2.3                    | 4.3  |
| Distal Esophagus   | 2.9                    | 2.5  | 3.1                    | 3.3   | 7.4                    | 5.8  | 1.6                    | 1.1  | 6.6                    | 4.7  |
| R. Lung (normal)   | 0.8                    | 0.8  | 0.8                    | 1     | 0.6                    | 0.7  | 0.4                    | 0.4  | 0.5                    | 1.2  |
| Stomach Fundus     | 33.8                   | 32.3 | 32.5                   | 43    | 31.3                   | 16.1 | 8.8                    | 6.8  | 31.9                   | 42.8 |
| Stomach Body       | 18.6                   | 10.9 | 14.1                   | 14.4  | 12.3                   | 10.7 | 3.2                    | 3.3  | 5.6                    | 48.5 |
| Stomach Antrum     | 9.7                    | 15.2 | 25.5                   | 13.6  | 8.1                    | 9.4  | 4.1                    | 4.3  | 9.9                    | 30.8 |
| R. Liver (normal)  | 1.4                    | 1.4  | 2                      | 2.1   | 0.9                    | 1    | 1.1                    | 1.3  | 3                      | 1.7  |
| Pancreas (normal)  | 12.3                   | 9.7  | 13.1                   | 11.9  | 12.7                   | 10.6 | 11.8                   | 8.6  | 2.5                    | 1.6  |
| L. Kidney          | 69                     | 63.7 | 97.7                   | 90    | 65.1                   | 67.5 | 76.1                   | 75.2 | 67.2                   | 65.1 |
| Prox. Small Bowel  | 15                     | 18.6 | 35.7                   | 10.3  | 34.6                   | 12.8 | 8.5                    | 8.7  | 12.1                   | 19.3 |
| Distal Small Bowel | 5.2                    | 14   | 18.3                   | 112.4 | 29.3                   | 15.5 | 9.5                    | 39.3 | 12.8                   | 46.3 |
| Ascending Colon    | 5.2                    | 8.9  | 6.2                    | 57.2  | 14.7                   | 25.4 | 5.8                    | 5.8  | 5.3                    | 7    |
| Transverse Colon   | 8.4                    | 4.9  | 6.7                    | 16.7  | 4.2                    | 4    | 2.8                    | 4.7  | 4.3                    | 4    |
| Descending Colon   | 4.3                    | 9.8  | 9.1                    | 8.3   | 2.6                    | 4.8  | 0.6                    | 3    | 4.1                    | 5.7  |
| Rectum             | 6.2                    | 7.2  | 9.1                    | 4.7   | 2.9                    | 2.9  | 1.8                    | 1.2  | 5.1                    | 7.4  |
| Bladder            | 5.3                    | 9    | 18.4                   | 13.4  | 33.8                   | 48.3 | 35.6                   | 6.8  | 15.3                   | 10.1 |
| Uterus             | 1.5                    | 1.2  | 5.5                    | 2.3   | 2.4                    | 3.6  | 5.2                    | 2.9  | N/A                    | N/A  |
| Prostate           | N/A                    | N/A  | N/A                    | N/A   | N/A                    | N/A  | N/A                    | N/A  | 9.8                    | 7.5  |
