# Supplementary material
Source: PubMed Central journal article supplement (PMC6377828)
Supplement: NIHMS1512001-supplement-7.pdf [file NIHMS1512001-supplement-7.pdf]

**Supplemental Table S4:** Maximum standard uptake values (SUV<sub>max</sub>) for primary and metastatic lesions observed in the three subjects, decay corrected to the time of injection.

| Lesions/Abnormalities:                          | Minutes after injection |      |         |         |
|-------------------------------------------------|-------------------------|------|---------|---------|
|                                                 | 30                      | 60   | 120     | 180     |
| <b>Subject 1</b>                                |                         |      |         |         |
| Right Upper Lobe Primary Lesion                 | 4.6                     | 5.2  | 6.2     | 6.1     |
| Right Iliac Wing Lytic Lesion                   | 14.1                    | 13.5 | 12.9    | 12.8    |
| <b>Subject 2</b>                                |                         |      |         |         |
| Right Breast Primary Lesion                     | 4                       | 3.9  | 4       | 3.9     |
| Left Iliac Bone                                 | 13.4                    | 13.1 | 13      | 12      |
| Sacrum                                          | 8.3                     | 8.8  | 9.5     | 11.1    |
| Right Iliac Wing                                | 7.6                     | 7.4  | 8.4     | 9.3     |
| Right Axillary Lymph Node (largest of multiple) | 4.7                     | 4.4  | 4.4     | 4.9     |
| Sub-Carinal Lymph Node (largest of multiple)    | 7                       | 7.7  | 7.8     | 7.5     |
| <b>Subject 3</b>                                |                         |      |         |         |
| Right Upper Lobe/Right Lower Lobe Consolidation | 9.5                     | 10.6 | 11.5    | 12.7    |
| Right Parietal Brain                            | 2.5                     | 2.7  | 2.8     | 2.3     |
| Left Parietal Brain                             | 2.2                     | 2.4  | 1.7     | 2.6     |
| Right Temporal Brain                            | 0.4                     | 0.6  | 0.8     | 0.5     |
| Left Frontal Brain                              | 2.1                     | 2.4  | 2.7     | 3.1     |
| Occipital Brain                                 | 1.0                     | 1.0  | non-vis | non-vis |
| Left Sacral Ala                                 | 4.8                     | 4.5  | 4.9     | 5.2     |
| Left Femoral Neck                               | 2.6                     | 3    | 3.3     | 3.1     |
| Right Adrenal                                   | 8.6                     | 7.3  | 9.7     | 8.1     |
| Right Cheek Lymph Node                          | 2.5                     | 2.1  | 1.8     | 1.8     |
| <b>Subject 4</b>                                |                         |      |         |         |
| Left Hepatic Lobe Upper                         | 2.3                     | 2.3  | 2       | 1.8     |
| Left Hepatic Lobe Lower / Lateral               | 2.9                     | 3.4  | 3.1     | 2.9     |
| Right Lower Lobe (lung)                         | 0.5                     | 0.6  | 0.8     | 0.7     |
| Right Internal Mammary Lymph Node               | 1.8                     | 1.7  | 1.9     | 2       |
| Left Upper Lobe (lung)                          | 0.7                     | 0.9  | 0.8     | 1.2     |
| Left Supraclavicular Lymph Node                 | 1.4                     | 1.4  | 0.9     | 1.3     |
| <b>Subject 5</b>                                |                         |      |         |         |
| Right Lower Lobe (lung) Posterior               | 1.1                     | 1.4  | 1.7     | 2.4     |
| Right Lower Lobe (lung) Medial                  | 0.8                     | 0.7  | 1.8     | 1.8     |
| Right Lower Lobe (lung) Lateral                 | 1                       | 0.6  | 1.6     | 1.3     |
